# Supplementary material for: Class II:2 malocclusion—prevalence and progression of labial gingival recessions during Herbst-Multibracket appliance treatment
Source: Springer Nature journal article supplement (doi:10.1007/s00784-020-03243-2), 2020-02-27
Supplement: MOESM1 [file 17748136]

**Supplementary Table 1**

Prevalence (%) of labial gingival recession for the teeth 17-47 before Tx (T0) in all included study casts for groups "complete" (CP, n=94) and "incomplete" (INCP, n=79). Labial gingival recession categorised by magnitude: none (<0.5mm), 0.5-<1.0mm, ≥1.0-<2.0mm, ≥2.0mm. In addition, the p-value of the statistical comparison ("incomplete" vs. "complete") is shown for the category none (<0.5mm).

| L<br>G<br>R<br><br>p<br>r<br>e<br>v<br>a<br>l<br>e<br>n<br>c<br>e | None (<0.5mm)  | 100     | 100     | 98.9    | 100     | 97.8    | 98.7    | 94.7    | 96.2    | 100     | 100     | 100     | 97.4    | 100     | 100     | 100     | 100     | 100     | 100     | 100     | 94.7    | 98.7    | 98.9    | 100     | 97.9    | 100     | 100     | 100     |      |
|-------------------------------------------------------------------|----------------|---------|---------|---------|---------|---------|---------|---------|---------|---------|---------|---------|---------|---------|---------|---------|---------|---------|---------|---------|---------|---------|---------|---------|---------|---------|---------|---------|------|
|                                                                   |                | p=1.000 |         | p=0.361 |         | p=0.665 |         | p=0.648 |         | p=1.000 |         | p=0.123 |         | p=1.000 |         | p=1.000 |         | p=1.000 |         | p=1.000 |         | p=0.147 |         | p=0.355 |         | p=0.192 |         | p=1.000 |      |
|                                                                   | ≥0.5 - <1.0 mm | 0.0     | 0.0     | 0.0     | 0.0     | 1.1     | 1.3     | 2.1     | 2.5     | 0.0     | 0.0     | 0.0     | 1.3     | 0.0     | 0.0     | 0.0     | 0.0     | 0.0     | 0.0     | 0.0     | 0.0     | 2.1     | 1.3     | 0.0     | 0.0     | 0.0     | 0.0     | 0.0     | 0.0  |
|                                                                   | ≥1.0 - <2.0 mm | 0.0     | 0.0     | 1.1     | 0.0     | 1.1     | 0.0     | 3.2     | 1.3     | 0.0     | 0.0     | 0.0     | 1.3     | 0.0     | 0.0     | 0.0     | 0.0     | 0.0     | 0.0     | 0.0     | 0.0     | 3.2     | 0.0     | 1.1     | 0.0     | 2.1     | 0.0     | 0.0     | 0.0  |
|                                                                   | ≥ 2.0 mm       | 0.0     | 0.0     | 0.0     | 0.0     | 0.0     | 0.0     | 0.0     | 0.0     | 0.0     | 0.0     | 0.0     | 0.0     | 0.0     | 0.0     | 0.0     | 0.0     | 0.0     | 0.0     | 0.0     | 0.0     | 0.0     | 0.0     | 0.0     | 0.0     | 0.0     | 0.0     | 0.0     | 0.0  |
| Total                                                             | 0.0            | 0.0     | 1.1     | 0.0     | 2.2     | 1.3     | 5.3     | 3.8     | 0.0     | 0.0     | 0.0     | 2.6     | 0.0     | 0.0     | 0.0     | 0.0     | 0.0     | 0.0     | 0.0     | 0.0     | 5.3     | 1.3     | 1.1     | 0.0     | 2.1     | 0.0     | 0.0     | 0.0     |      |
| Group                                                             |                | CP      | INCP    | CP      | INCP |
|                                                                   |                | 17      |         | 16      |         | 15      |         | 14      |         | 13      |         | 12      |         | 11      |         | 21      |         | 22      |         | 23      |         | 24      |         | 25      |         | 26      |         | 27      |      |
|                                                                   |                | Tooth   |         |         |         |         |         |         |         |         |         |         |         |         |         |         |         |         |         |         |         |         |         |         |         |         |         |         |      |
|                                                                   |                | 47      |         | 46      |         | 45      |         | 44      |         | 43      |         | 42      |         | 41      |         | 31      |         | 32      |         | 33      |         | 34      |         | 35      |         | 36      |         | 37      |      |
| Group                                                             |                | CP      | INCP    | CP      | INCP |
| L<br>G<br>R<br><br>p<br>r<br>e<br>v<br>a<br>l<br>e<br>n<br>c<br>e | Total          | 0.0     | 0.0     | 2.2     | 0.0     | 2.2     | 1.3     | 4.3     | 1.3     | 1.1     | 1.3     | 0.0     | 0.0     | 1.1     | 0.0     | 2.1     | 0.0     | 0.0     | 0.0     | 2.2     | 0.0     | 3.2     | 1.3     | 1.1     | 1.3     | 2.2     | 0.0     | 0.0     | 0.0  |
|                                                                   | ≥ 2.0 mm       | 0.0     | 0.0     | 0.0     | 0.0     | 0.0     | 0.0     | 0.0     | 0.0     | 0.0     | 0.0     | 0.0     | 0.0     | 0.0     | 0.0     | 0.0     | 0.0     | 0.0     | 0.0     | 0.0     | 0.0     | 0.0     | 0.0     | 0.0     | 0.0     | 0.0     | 0.0     | 0.0     | 0.0  |
|                                                                   | ≥1.0 - <2.0 mm | 0.0     | 0.0     | 2.2     | 0.0     | 2.2     | 1.3     | 4.3     | 1.3     | 1.1     | 1.3     | 0.0     | 0.0     | 1.1     | 0.0     | 2.1     | 0.0     | 0.0     | 0.0     | 2.2     | 0.0     | 3.2     | 1.3     | 1.1     | 1.3     | 2.2     | 0.0     | 0.0     | 0.0  |
|                                                                   | ≥0.5 - <1.0 mm | 0.0     | 0.0     | 0.0     | 0.0     | 0.0     | 0.0     | 0.0     | 0.0     | 0.0     | 0.0     | 0.0     | 0.0     | 0.0     | 0.0     | 0.0     | 0.0     | 0.0     | 0.0     | 0.0     | 0.0     | 0.0     | 0.0     | 0.0     | 0.0     | 0.0     | 0.0     | 0.0     | 0.0  |
|                                                                   | None (<0.5mm)  | 100     | 100     | 98.0    | 100     | 97.8    | 98.7    | 95.7    | 98.7    | 98.9    | 98.7    | 100     | 100     | 98.9    | 100     | 97.9    | 100     | 100     | 100     | 97.8    | 100     | 96.8    | 98.7    | 98.9    | 98.7    | 97.8    | 100     | 100     | 100  |
|                                                                   | p=1.000        |         | p=0.190 |         | p=0.659 |         | p=0.242 |         | p=0.884 |         | p=1.000 |         | p=0.361 |         | p=0.196 |         | p=1.000 |         | p=0.199 |         | p=0.401 |         | p=0.908 |         | p=0.185 |         | p=1.000 |         |      |
