# Supplementary material for: Class II:2 malocclusion—prevalence and progression of labial gingival recessions during Herbst-Multibracket appliance treatment
Source: Springer Nature journal article supplement (doi:10.1007/s00784-020-03243-2), 2020-02-27
Supplement: MOESM2 [file 17748136]

**Supplementary Table 2**

Magnitude (mm) of labial gingival recession for the teeth 17-47 before Tx (T0) in all included study casts for groups "complete" (CP, n=94) and "incomplete" (INCP, n=79). The mean value and standard deviation as well as the median, minimum and maximum values are given. In addition, the p-value of the statistical comparison ("incomplete" vs. "complete") is given for each type of tooth.

| L<br>G<br>R<br><br>m<br>a<br>g<br>n<br>i<br>t<br>u<br>d<br>e | Max    | 0.0     | 0.0     | 1.5     | 0.0     | 1.0     | 0.5     | 1.0     | 1.5     | 0.0     | 0.0     | 0.0     | 1.0     | 0.0     | 0.0     | 0.0  | 0.0  | 0.0  | 0.0  | 0.0  | 0.0  | 1.0  | 0.5  | 1.0  | 0.0  | 1.0  | 0.0  | 0.0  | 0.0  |      |
|--------------------------------------------------------------|--------|---------|---------|---------|---------|---------|---------|---------|---------|---------|---------|---------|---------|---------|---------|------|------|------|------|------|------|------|------|------|------|------|------|------|------|------|
|                                                              | Min    | 0.0     |         |         |         |         |         |         |         |         |         |         |         |         |         |      |      |      |      |      |      |      |      |      |      |      |      |      |      |      |
|                                                              | Median | 0.0     | 0.0     | 0.0     | 0.0     | 0.0     | 0.0     | 0.0     | 0.0     | 0.0     | 0.0     | 0.0     | 0.0     | 0.0     | 0.0     | 0.0  | 0.0  | 0.0  | 0.0  | 0.0  | 0.0  | 0.0  | 0.0  | 0.0  | 0.0  | 0.0  | 0.0  | 0.0  | 0.0  | 0.0  |
|                                                              | SD     | 0.00    | 0.00    | 0.15    | 0.00    | 0.11    | 0.06    | 0.19    | 0.19    | 0.00    | 0.00    | 0.00    | 0.13    | 0.00    | 0.00    | 0.00 | 0.00 | 0.00 | 0.00 | 0.00 | 0.00 | 0.00 | 0.19 | 0.06 | 0.10 | 0.00 | 0.15 | 0.00 | 0.00 | 0.00 |
|                                                              | Mean   | 0.0     | 0.0     | 0.0     | 0.0     | 0.0     | 0.0     | 0.0     | 0.0     | 0.0     | 0.0     | 0.0     | 0.0     | 0.0     | 0.0     | 0.0  | 0.0  | 0.0  | 0.0  | 0.0  | 0.0  | 0.0  | 0.0  | 0.0  | 0.0  | 0.0  | 0.0  | 0.0  | 0.0  | 0.0  |
| Group                                                        | CP     | INCP    | CP      | INCP    | CP      | INCP    | CP      | INCP    | CP      | INCP    | CP      | INCP    | CP      | INCP    | CP      | INCP | CP   | INCP | CP   | INCP | CP   | INCP | CP   | INCP | CP   | INCP | CP   | INCP | CP   | INCP |
|                                                              |        | 17      | 16      | 15      | 14      | 13      | 12      | 11      | 21      | 22      | 23      | 24      | 25      | 26      | 27      |      |      |      |      |      |      |      |      |      |      |      |      |      |      |      |
|                                                              |        | Tooth   |         |         |         |         |         |         |         |         |         |         |         |         |         |      |      |      |      |      |      |      |      |      |      |      |      |      |      |      |
|                                                              |        | 47      | 46      | 45      | 44      | 43      | 42      | 41      | 31      | 32      | 33      | 34      | 35      | 36      | 37      |      |      |      |      |      |      |      |      |      |      |      |      |      |      |      |
| Group                                                        | CP     | INCP    | CP      | INCP    | CP      | INCP    | CP      | INCP    | CP      | INCP    | CP      | INCP    | CP      | INCP    | CP      | INCP | CP   | INCP | CP   | INCP | CP   | INCP | CP   | INCP | CP   | INCP | CP   | INCP | CP   | INCP |
| L<br>G<br>R<br><br>m<br>a<br>g<br>n<br>i<br>t<br>u<br>d<br>e | Mean   | 0.0     | 0.0     | 0.0     | 0.0     | 0.0     | 0.0     | 0.0     | 0.0     | 0.0     | 0.0     | 0.0     | 0.0     | 0.0     | 0.0     | 0.0  | 0.0  | 0.0  | 0.0  | 0.0  | 0.0  | 0.0  | 0.0  | 0.0  | 0.0  | 0.0  | 0.0  | 0.0  | 0.0  |      |
|                                                              | SD     | 0.00    | 0.00    | 0.15    | 0.00    | 0.15    | 0.11    | 0.20    | 0.11    | 0.10    | 0.12    | 0.00    | 0.00    | 0.10    | 0.00    | 0.15 | 0.00 | 0.00 | 0.00 | 0.15 | 0.00 | 0.18 | 0.11 | 0.10 | 0.11 | 0.15 | 0.00 | 0.00 | 0.00 |      |
|                                                              | Median | 0.0     | 0.0     | 0.0     | 0.0     | 0.0     | 0.0     | 0.0     | 0.0     | 0.0     | 0.0     | 0.0     | 0.0     | 0.0     | 0.0     | 0.0  | 0.0  | 0.0  | 0.0  | 0.0  | 0.0  | 0.0  | 0.0  | 0.0  | 0.0  | 0.0  | 0.0  | 0.0  | 0.0  | 0.0  |
|                                                              | Min    | 0.0     |         |         |         |         |         |         |         |         |         |         |         |         |         |      |      |      |      |      |      |      |      |      |      |      |      |      |      |      |
|                                                              | Max    | 0.0     | 0.0     | 1.0     | 0.0     | 1.0     | 1.0     | 1.0     | 1.0     | 1.0     | 1.0     | 0.0     | 0.0     | 1.0     | 0.0     | 1.0  | 0.0  | 0.0  | 0.0  | 1.0  | 0.0  | 1.0  | 1.0  | 1.0  | 1.0  | 1.0  | 0.0  | 0.0  | 0.0  | 0.0  |
|                                                              |        | p=1.000 | p=0.362 | p=0.661 | p=0.646 | p=1.000 | p=0.124 | p=1.000 | p=1.000 | p=1.000 | p=1.000 | p=0.144 | p=0.357 | p=0.194 | p=1.000 |      |      |      |      |      |      |      |      |      |      |      |      |      |      |      |
